# Supplementary material for: Comparing record linkage software programs and algorithms using real-world data
Source: PubMed Central journal article supplement (PMC6759179; doi:10.1371/journal.pone.0221459), 2019-09-24
Supplement: pone.0221459.s001.pdf [file pone.0221459.s001.pdf]

## Supporting Information for:

“Comparing record linkage software programs and algorithms using real-world data”

Karr AF et al.

### Additional details about materials and methods

Because of the large numbers of record pairs being compared and the computer processing and memory required for linkage, we chose datasets between 100,000 to 200,000 records apiece. Additionally, we used datasets that we knew to have an ample number of records in common. We used a 64-bit Windows 10 operating system on a Dell Optiplex 7050 having an Intel® Core™ i7-7700 CPU with 4 cores running at 3.60 GHz, 64GB of RAM, and a solid-state drive.

**Table A. Linkage software packages evaluated**

| Package                                        | Version                  | Requires           | Origin                                                   | Download URL                                                                                                                                                                                                                                                                                                                  |
|------------------------------------------------|--------------------------|--------------------|----------------------------------------------------------|-------------------------------------------------------------------------------------------------------------------------------------------------------------------------------------------------------------------------------------------------------------------------------------------------------------------------------|
| R package<br>Core System<br>R<br>RecordLinkage | 3.4.0<br>3.4.0<br>0.4-10 | R                  | The open source R RecordLinkage package from R Studio[1] | <a href="https://mirrors.nics.utk.edu/cran/">https://mirrors.nics.utk.edu/cran/</a><br><a href="https://mirrors.nics.utk.edu/cran/">https://mirrors.nics.utk.edu/cran/</a><br><a href="https://cran.r-project.org/web/packages/RecordLinkage/index.html">https://cran.r-project.org/web/packages/RecordLinkage/index.html</a> |
| Merge ToolBox                                  | 0.75                     | Java               | German Record Linkage Center                             | <a href="http://soz-159.uni-duisburg.de/software/index.html">http://soz-159.uni-<br/>duisburg.de/software/index.html</a>                                                                                                                                                                                                      |
| Curtin University Probabilistic Linkage Engine | -                        | Windows Powershell | LinXmart, Curtin University Population Linkage Engine    | Obtained directly from Curtin University                                                                                                                                                                                                                                                                                      |
| Link Plus                                      | 2.0                      |                    | Centers for Disease Control and Prevention [2]           | <a href="ftp://ftp.cdc.gov/pub/Software/RegistryPlus/Link_Plus/RPLinkPlus-2.0.exe">ftp://ftp.cdc.gov/pub/Software/<br/>RegistryPlus/Link_Plus/RPLinkPlus-2.0.exe</a>                                                                                                                                                          |

## Empirical cumulative distribution functions

We produced empirical cumulative distribution functions (ECDFs) of scaled weights for the 17 linkage runs (Fig A). For each value of scaled weight ( $x$ ), the corresponding  $y$ -value is the fraction of pairs with scaled weight less than or equal to  $x$ . The number of weights is always finite; consequently, all of these are step functions. However, when the number of weights is large, as for some of the inexact string matching methods, the ECDFs appear to be continuous. More rapid increases in the ECDF (i.e., closer to the left of the graph) correspond to higher proportions of pairs being assigned low weights, which means that even for low thresholds, most pairs would be declared nonmatches. For a given threshold  $x$ , the proportion of declared *matches* is 1.0 minus the value of the ECDF at  $x$ . We observed this behavior for most packages and runs, where most nonmatches are determined at low thresholds. By contrast, using inexact string matching for Link Plus (LP)—and to a lesser extent, for Merge ToolBox (MTB)—the rise in the ECDF occurs only for larger values of  $x$ . Specifically, LP/INEX/FS and LP/INEX/EM yield small numbers of declared nonmatches for thresholds below 0.75.

**Fig A. Empirical cumulative distribution functions of the scaled weights for the 17 linkage runs.**

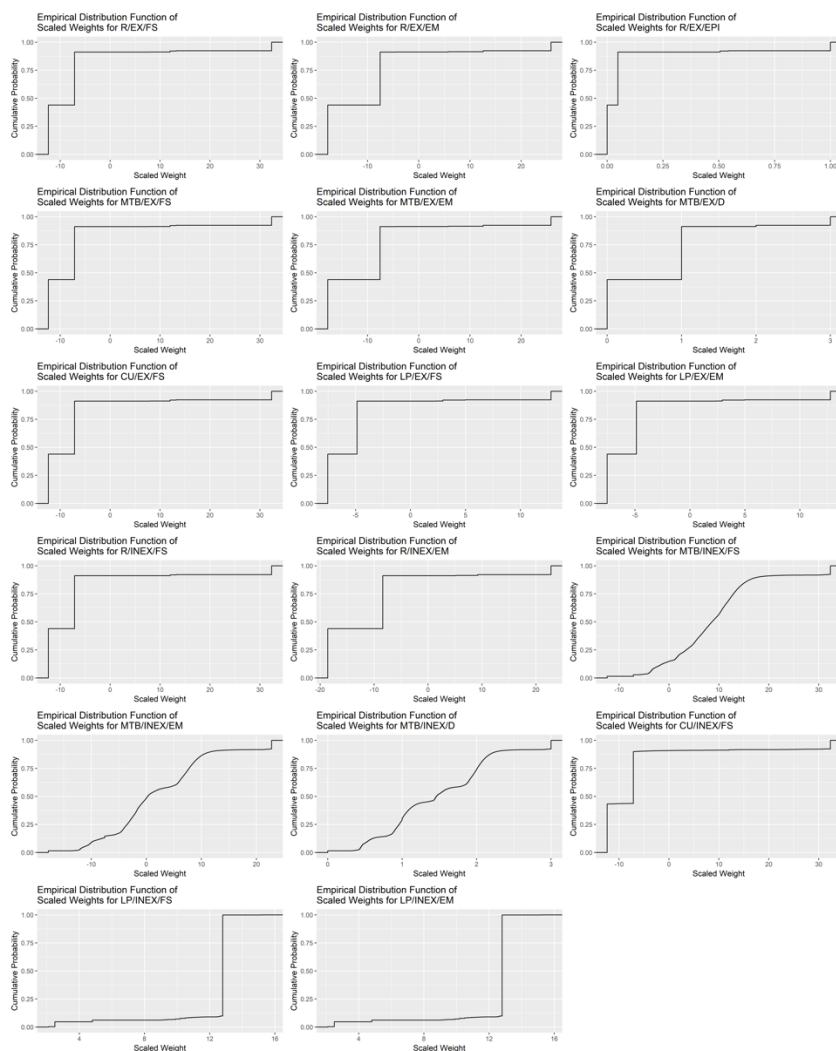

EX, exact string matching; JW, Jaro-Winkler (inexact string matching); R, R package; MTB, Merge ToolBox; C, Curtin University Probabilistic Linkage Engine; LP, Link Plus.

## Relationships among weights

Among the 9 linkage runs that used exact string matching, the same record pairs tended to be grouped together by weight similarly across runs. All runs agreed on the pairs with the highest rank and, except for the run with deterministic linkage, second highest rank. However, the order and distribution of assigned weights differed by algorithm (Table B).

**Table B. Concordance of pair rankings among the exact string matching methods.**

| Number of Pairs | Rank    |         |          |           |           |          |          |          |          |
|-----------------|---------|---------|----------|-----------|-----------|----------|----------|----------|----------|
|                 | R/EX/FS | R/EX/EM | R/EX/EPI | MTB/EX/FS | MTB/EX/EM | MTB/EX/D | CU/EX/FS | LP/EX/FS | LP/EX/EM |
| 30,536          | 1       | 1       | 1        | 1         | 1         | 1        | 1        | 1        | 1        |
| 24              | 2       | 2       | 2        | 2         | 2         | 2        | 2        | 2        | 2        |
| 1,055           | 3       | 4       | 3        | 3         | 4         | 2        | 3        | 3        | 3        |
| 3,366           | 4       | 3       | 4        | 4         | 3         | 2        | 4        | 4        | 4        |
| 163             | 5       | 6       | 5        | 5         | 6         | 3        | 5        | 5        | 5        |
| 7               | 6       | 5       | 6        | 6         | 5         | 3        | 6        | 6        | 6        |
| 3               | 7       | 7       | 7        | 7         | 7         | 3        |          | 7        | 7        |
| 189,270         | 7       | 7       | 7        | 7         | 7         | 3        | 7        | 7        | 7        |
| 10              | 8       | 8       | 8        | 8         | 8         | 4        | 8        | 8        | 8        |
| 8               | 8       | 8       | 8        | 9         | 9         | 4        |          | 9        | 9        |
| 176,048         | 8       | 8       | 8        | 9         | 9         | 4        | 9        | 9        | 9        |

EX, exact string matching; R, R package; MTB, Merge ToolBox; CU, Curtin University Probabilistic Linkage Engine; LP, Link Plus; FS, probabilistic, Fellegi-Sunter; EM, probabilistic, expectation-maximization; EPI, probabilistic, EpiLink; D, deterministic.

## Principal components analysis

The characteristics of the first 4 principal components of the 17 sets of weights are shown in Table C. Based on the loading matrix (not included here), we interpret the four principal components (PCs) as follows:

- PC1 is the high common correlation among the 17 methods;
- PC2 differentiates methods using exact string matching from methods using inexact string matching;
- PC3 picks out R/INEX/FS, R/INEX/EM, LP/INEX/FS and LP/INEX/EM among the methods using inexact string matching: those with relatively few weights;
- PC4 separates R and MTB from CU and LP.

**Table C. Characteristics of the first four principal components of the 17 sets of weights.**

|                        | PC1    | PC2    | PC3    | PC4    |
|------------------------|--------|--------|--------|--------|
| Standard deviation     | 3.787  | 1.325  | 0.721  | 0.456  |
| Proportion of Variance | 0.8435 | 0.1033 | 0.0306 | 0.0123 |
| Cumulative Proportion  | 0.8435 | 0.9468 | 0.9774 | 0.9897 |

PC, principal component.

## Comparative performance of the methods

We compared the numbers of declared matches of record pairs at different threshold values of scaled weights (Figs B, C). As the weight threshold increased to 0.667, MTB/EX/D was the first run to declare as matches the 30,536 record pairs matching on date of birth (DOB), first name, last name, and gender. Four other linkage runs (R/EX/FS, R/EX/EM, LP/INEX/FS, and LP/INEX/EM) reached this core set of record pairs at thresholds less than 0.8. MTB/INEX/FS, MTB/EX/D, and MTB/INEX/D required thresholds exceeding 0.995, and R/INEX/EM required a threshold of 1.0 to arrive at 30,536 matches. R/INEX/FS and CU/INEX/FS never produced 30,536 matches for any threshold value.

**Fig B. Declared matches using scaled weights as a function of threshold between 0.75 and 1.**

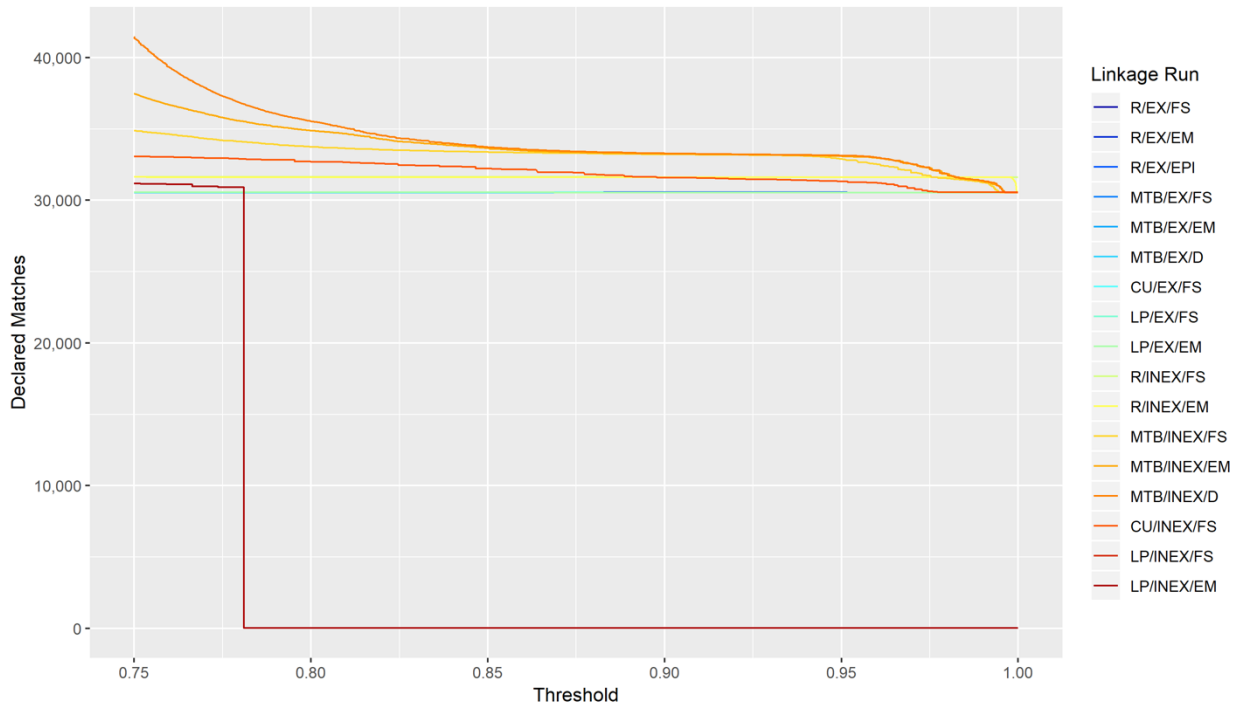

R, R package; MTB, Merge ToolBox; CU, Curtin University Probabilistic Linkage Engine; LP, Link Plus; EX, exact string matching; INEX, inexact string matching; FS, probabilistic, Fellegi-Sunter; EM, probabilistic, expectation-maximization; EPI, probabilistic, EpiLink; D, deterministic.

Fig C is an expanded version of Fig B. It shows dramatic variation among the methods for some values of the threshold.

**Fig C. Declared matches using scaled weights as a function of threshold, for all thresholds.**

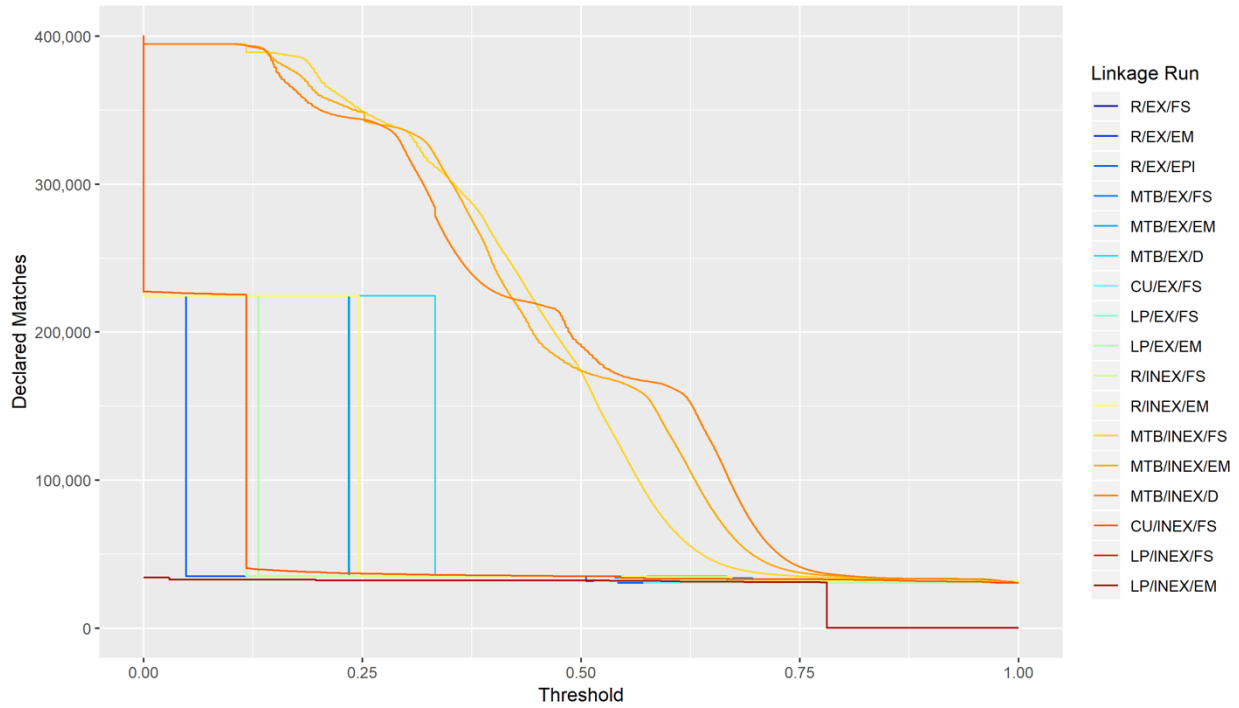

R, R package; MTB, Merge ToolBox; CU, Curtin University Probabilistic Linkage Engine; LP, Link Plus; EX, exact string matching; INEX, inexact string matching; FS, probabilistic, Fellegi-Sunter; EM, probabilistic, expectation-maximization; EPI, probabilistic, EpiLink; D, deterministic.

Tables D and E contain the standard decision rule characteristics for all 17 runs blocking on DOB, using inpatient MRN as the gold standard to establish accuracy. Table D presents the declared matches as pairs with the highest weight, whereas Table E presents the declared matches as pairs with the highest or second highest weight.

**Table D. Standard decision rule characteristics for the 17 DOB linkage runs when declared matched are those with the highest weight.**

| Linkage Run Name | String Matching | Weight Determination | Sensitivity <sup>a</sup> (%) | Specificity <sup>b</sup> (%) | PPV <sup>c</sup> (%) | NPV <sup>d</sup> (%) |
|------------------|-----------------|----------------------|------------------------------|------------------------------|----------------------|----------------------|
| R/EX/FS          | Exact           | Prob-FS              | 90.48                        | 99.78                        | 97.35                | 99.15                |
| R/EX/EM          | Exact           | Prob-EM              | 90.48                        | 99.78                        | 97.35                | 99.15                |
| R/EX/EPI         | Exact           | Prob-EPI             | 90.48                        | 99.78                        | 97.35                | 99.15                |
| MTB/EX/FS        | Exact           | Prob-FS              | 90.48                        | 99.78                        | 97.35                | 99.15                |
| MTB/EX/EM        | Exact           | Prob-EM              | 90.48                        | 99.78                        | 97.35                | 99.15                |
| MTB/EX/D         | Exact           | Det                  | 90.48                        | 99.78                        | 97.35                | 99.15                |
| CU/EX/FS         | Exact           | Prob-FS              | 90.48                        | 99.78                        | 97.35                | 99.15                |
| LP/EX/FS         | Exact           | Prob-FS              | 90.48                        | 99.78                        | 97.35                | 99.15                |
| LP/EX/EM         | Exact           | Prob-EM              | 90.48                        | 99.78                        | 97.35                | 99.15                |
| R/INEX/FS        | Inexact         | Prob-FS              | 93.36                        | 99.74                        | 97.01                | 99.41                |
| R/INEX/EM        | Inexact         | Prob-EM              | 90.48                        | 99.78                        | 97.35                | 99.15                |
| MTB/INEX/FS      | Inexact         | Prob-FS              | 90.48                        | 99.78                        | 97.35                | 99.15                |
| MTB/INEX/EM      | Inexact         | Prob-EM              | 90.48                        | 99.78                        | 97.35                | 99.15                |
| MTB/INEX/D       | Inexact         | Det                  | 90.48                        | 99.78                        | 97.35                | 99.15                |
| CU/INEX/FS       | Inexact         | Prob-FS              | 90.51                        | 99.78                        | 97.33                | 99.16                |
| LP/INEX/FS       | Inexact         | Prob-FS              | 0.04                         | 100.00                       | 86.67                | 91.80                |
| LP/INEX/EM       | Inexact         | Prob-EM              | 0.04                         | 100.00                       | 86.67                | 91.80                |

DOB, date of birth; PPV, positive predictive value; NNV, negative predictive value; R, R package; MTB, Merge ToolBox; CU, Curtin University Probabilistic Linkage Engine; LP, Link Plus; Prob-FS, probabilistic, Fellegi-Sunter; Prob-EM, probabilistic, expectation-maximization; Prob-EPI, probabilistic, EpiLink; Det, deterministic; MRN, medical record number.

All test characteristics are based on comparison with the gold standard, inpatient MRN.

<sup>a</sup> Sensitivity = percentage of record pairs with matching inpatient MRNs that are declared matches.

<sup>b</sup> Specificity = percentage of record pairs without matching inpatient MRNs that are declared non-matches.

<sup>c</sup> PPV = percentage of pairs that are declared matches for which the inpatient MRNs agree.

<sup>d</sup> NPV = percentage of pairs declared nonmatches for which the inpatient MRNs do not agree.

**Table E. Standard decision rule characteristics for the 17 DOB linkage runs when declared matches are those with the first or second highest weight.**

| Linkage Run Name | String Matching | Weight Determination | Sensitivity <sup>a</sup> (%) | Specificity <sup>b</sup> (%) | PPV <sup>c</sup> (%) | NPV <sup>d</sup> (%) |
|------------------|-----------------|----------------------|------------------------------|------------------------------|----------------------|----------------------|
| R/EX/FS          | Exact           | Prob-FS              | 90.53                        | 99.78                        | 97.34                | 99.16                |
| R/EX/EM          | Exact           | Prob-EM              | 90.54                        | 99.78                        | 97.34                | 99.16                |
| R/EX/EPI         | Exact           | Prob-EPI             | 90.54                        | 99.78                        | 97.34                | 99.16                |
| MTB/EX/FS        | Exact           | Prob-FS              | 90.54                        | 99.78                        | 97.34                | 99.16                |
| MTB/EX/EM        | Exact           | Prob-EM              | 90.54                        | 99.78                        | 97.34                | 99.16                |
| MTB/EX/D         | Exact           | Det                  | 98.57                        | 99.29                        | 92.58                | 99.87                |
| CU/EX/FS         | Exact           | Prob-FS              | 90.54                        | 99.78                        | 97.34                | 99.16                |
| LP/EX/FS         | Exact           | Prob-FS              | 90.54                        | 99.78                        | 97.34                | 99.16                |
| LP/EX/EM         | Exact           | Prob-EM              | 90.54                        | 99.78                        | 97.34                | 99.16                |
| R/INEX/FS        | Inexact         | Prob-FS              | 93.42                        | 99.74                        | 96.99                | 99.41                |
| R/INEX/EM        | Inexact         | Prob-EM              | 90.49                        | 99.78                        | 97.35                | 99.16                |
| MTB/INEX/FS      | Inexact         | Prob-FS              | 90.49                        | 99.78                        | 97.35                | 99.16                |
| MTB/INEX/EM      | Inexact         | Prob-EM              | 90.49                        | 99.78                        | 97.35                | 99.16                |
| MTB/INEX/D       | Inexact         | Det                  | 90.49                        | 99.78                        | 97.35                | 99.16                |
| CU/INEX/FS       | Inexact         | Prob-FS              | 90.52                        | 99.78                        | 97.33                | 99.16                |
| LP/INEX/FS       | Inexact         | Prob-FS              | 0.05                         | 100.00                       | 83.33                | 91.80                |
| LP/INEX/EM       | Inexact         | Prob-EM              | 0.05                         | 100.00                       | 83.33                | 91.80                |

DOB, date of birth; PPV, positive predictive value; NNV, negative predictive value; R, R package; MTB, Merge ToolBox; CU, Curtin University Probabilistic Linkage Engine; LP, Link Plus; Prob-FS, probabilistic, Fellegi-Sunter; Prob-EM, probabilistic, expectation-maximization; Prob-EPI, probabilistic, EpiLink; Det, deterministic; MRN, medical record number.

All test characteristics are based on comparison with the gold standard, inpatient MRN.

<sup>a</sup> Sensitivity = percentage of record pairs with matching inpatient MRNs that are declared matches.

<sup>b</sup> Specificity = percentage of record pairs without matching inpatient MRNs that are declared non-matches.

<sup>c</sup> PPV = percentage of pairs that are declared matches for which the inpatient MRNs agree.

<sup>d</sup> NPV = percentage of pairs declared nonmatches for which the inpatient MRNs do not agree.



Fig D is an expanded version of Fig 4 in the main text. Showing all values of sensitivity obscures any differences among the linkage runs.

**Fig D. ROC curves for all date of birth linkage runs, for all values of sensitivity.**

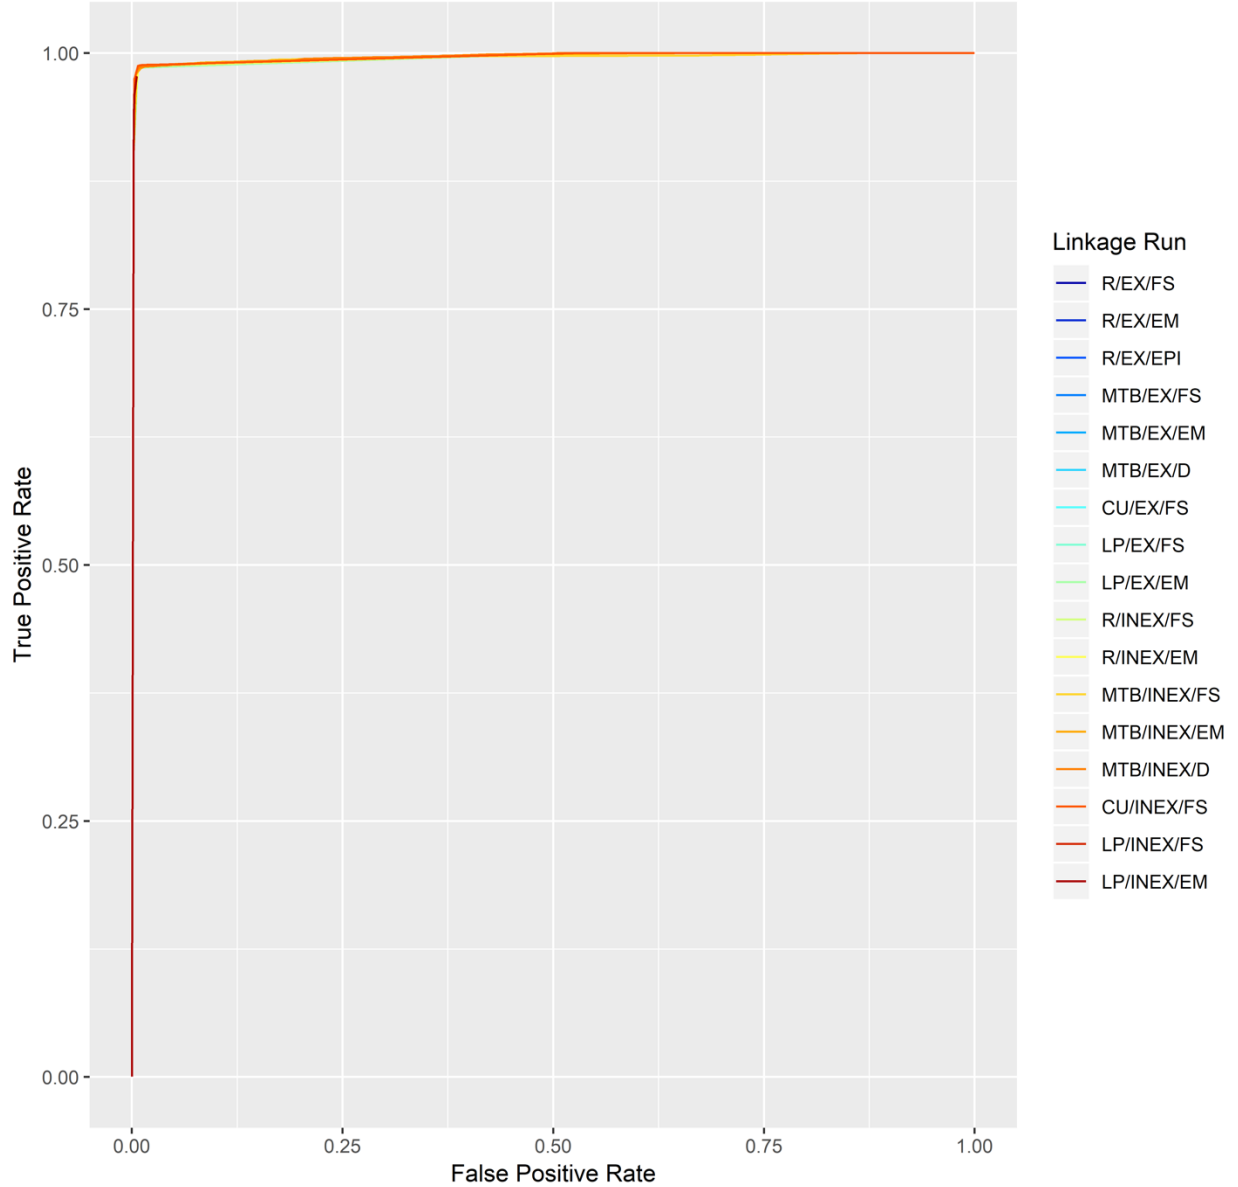

ROC, receiver operating characteristic; R, R package; MTB, Merge ToolBox; CU, Curtin University Probabilistic Linkage Engine; LP, Link Plus; EX, exact string matching; INEX, inexact string matching; FS, probabilistic, Fellegi-Sunter; EM, probabilistic, expectation-maximization; EPI, probabilistic, EpiLink; D, deterministic.

Table F contains exactly calculated values of the area under the receiver operating characteristic (ROC) curve (AUC) for 15 of the 17 values, when threshold scaled weight was the criterion for declaring a match and inpatient MRN was the gold standard. Linkage runs with inexact string matching slightly outperformed linkage runs with exact string matching, even if only at the thousandth decimal level. For example, linkage runs R/INEX/FS (0.9940) had a slightly higher AUC than R/EX/FS (0.9939), yet both used probabilistic Fellegi-Sunter weight determination. The other pairwise comparisons are R/INEX/EM and R/EX/EM (probabilistic, expectation-maximization); MTB/INEX/FS and MTB/EX/FS (probabilistic Fellegi-Sunter); MTB/INEX/EM and MTB/EX/EM (probabilistic, expectation-maximization); and MTB/INEX/D and MTB/EX/D (deterministic).

**Table F. AUC for all DOB linkage runs<sup>a</sup>.**

| Linkage Run Name | String Matching | Weight Determination | AUC          |
|------------------|-----------------|----------------------|--------------|
| R/EX/FS          | Exact           | Prob-FS              | 0.9939       |
| R/EX/EM          | Exact           | Prob-EM              | 0.9939       |
| R/EX/EPI         | Exact           | Prob-EPI             | 0.9939       |
| MTB/EX/FS        | Exact           | Prob-FS              | 0.9939       |
| MTB/EX/EM        | Exact           | Prob-EM              | 0.9939       |
| MTB/EX/D         | Exact           | Det                  | 0.9938       |
| CU/EX/FS         | Exact           | Prob-FS              | 0.9938       |
| LP/EX/FS         | Exact           | Prob-FS              | 0.9939       |
| LP/EX/EM         | Exact           | Prob-EM              | 0.9939       |
| R/INEX/FS        | Inexact         | Prob-FS              | 0.9940       |
| R/INEX/EM        | Inexact         | Prob-EM              | 0.9943       |
| MTB/INEX/FS      | Inexact         | Prob-FS              | 0.9940       |
| MTB/INEX/EM      | Inexact         | Prob-EM              | 0.9946       |
| MTB/INEX/D       | Inexact         | Det                  | 0.9948       |
| CU/INEX/FS       | Inexact         | Prob-FS              | 0.9946       |
| LP/INEX/FS       | Inexact         | Prob-FS              | <sup>b</sup> |
| LP/INEX/EM       | Inexact         | Prob-EM              | <sup>b</sup> |

AUC, area under the receiver operating characteristic curve; DOB, date of birth; R, R package; MTB, Merge ToolBox; CU, Curtin University Probabilistic Linkage Engine; LP, Link Plus; Prob-FS, probabilistic, Fellegi-Sunter; Prob-EM, probabilistic, expectation-maximization; Prob-EPI, probabilistic, EpiLink; Det, deterministic; MRN, medical record number.

<sup>a</sup> AUC values based on use of scaled weights as the decision criterion compared to the gold standard, inpatient medical record number.

<sup>b</sup> AUC incalculable due to missing low-value weights in Link Plus.

## Ensemble method: Rank 1 or 2 voting

Many researchers conducting linkage work use the highest or the two highest weights when declaring pairs to be matches. Consequently, for our second proposed rank ensemble method, we proposed the algorithm “Rank 1 or 2 Voting,” where the value assigned to each pair ranged from 0 to 17, computed by assessing the number of linkage runs that assigned the highest or second highest weight to that pair. The Rank 1 or 2 voting ensemble method declared as matches those pairs receiving at least  $k$  votes, where  $k$  ranges from 1 (the least conservative choice) to 17 (the most conservative choice). Fig E shows the ROC curve for this method compared to the average scaled weight ensemble method and the single matching rung with the highest AUC, deterministic linkage with inexact string matching using MBT (MBT/INEX/D).

Fig E. ROC curves for ensemble methods and best single matching method, sensitivity  $\geq 0.90$ .

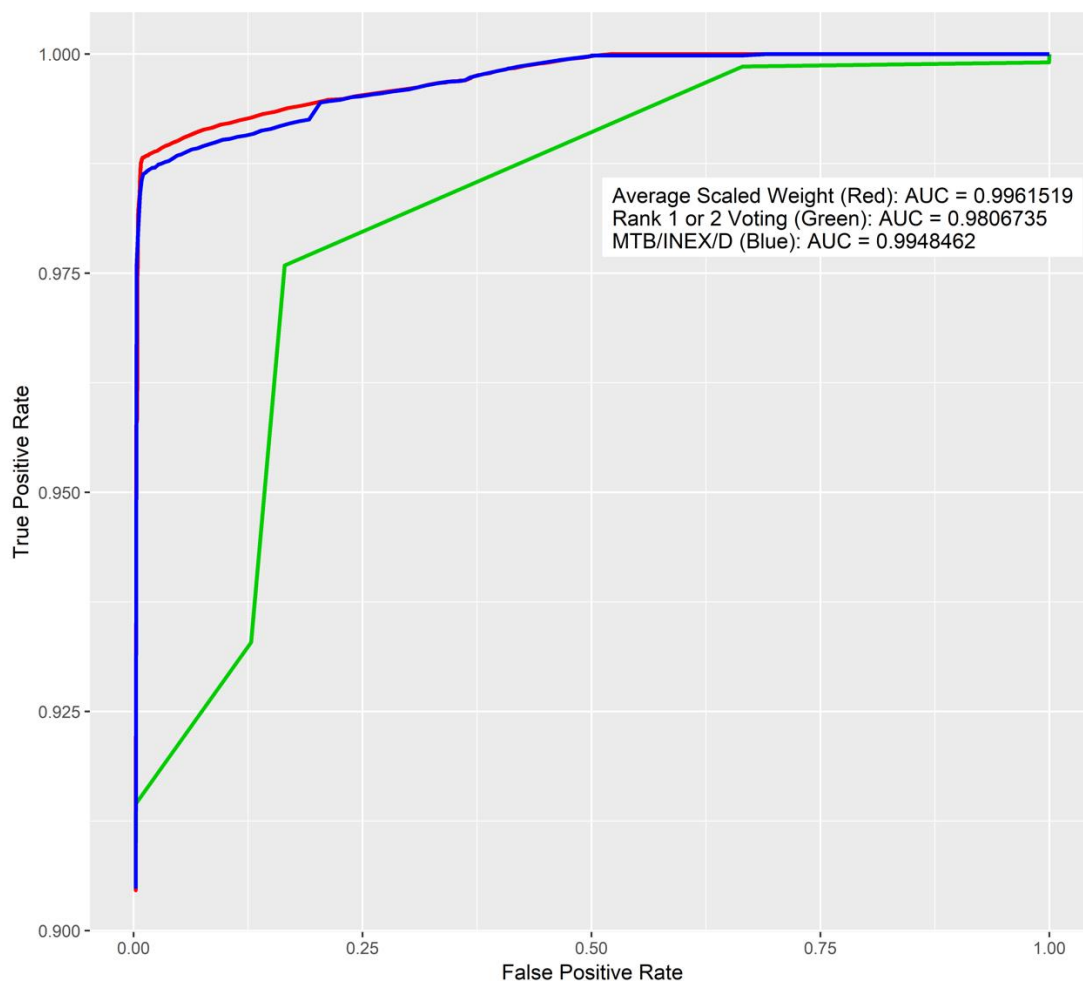

AUC, area under the receiver operating characteristic curve; ROC, receiver operating characteristic; MTB, Merge ToolBox; INEX, inexact string matching; D, deterministic.

## Year of birth experiment

In the DOB experiment, if records differed on either day or month of birth, they would not be declared a match by any of the methods despite matching on all other linkage variables. Although the 3 MTB inexact string matching linkage runs also yield the same 30,805 highest rank matches, it is unclear why the CU/EX/FS produces an additional 23 matches. As was also true for blocking on full date of birth, both LP/EX/FS and LP/INEX/EM declare only a handful of matches based on highest or second highest weights. The number of matches based on second highest weight varies considerably among the linkage runs, varying from 3 to 402,743, with both Prob-EM exact string matching runs producing large and identical numbers of matching pairs with second highest weight.

Notably, blocking on YOB imposed major computational challenges because of the 329-fold increase in the number of compared pairs (131,906,591), which has implications for running time and memory, both of which are approximately proportional to the number of compared pairs.

**Table G. Summary of weights produced by the 15 linkage runs using YOB as the blocking variable.**

| Linkage Run Name | String matching | Weight Determination | Number of Weights | Minimum Weight | Maximum Weight | Pairs with Highest Weight | Pairs with Second Highest Weight | Pairs with Lowest Weight <sup>d</sup> | Pairs with Second Lowest Weight <sup>b</sup> |
|------------------|-----------------|----------------------|-------------------|----------------|----------------|---------------------------|----------------------------------|---------------------------------------|----------------------------------------------|
| R/EX/FS          | Exact           | Prob-FS              | 8                 | -12.3808       | 32.35027       | 30,805                    | 26                               | 63,469,487                            | 67,973,584                                   |
| R/EX/EM          | Exact           | Prob-EM              | 8                 | -15.2857       | 23.61731       | 30,805                    | 371,180                          | 63,469,487                            | 28,065                                       |
| R/EX/EPI         | Exact           | Prob-EPI             | 8                 | 0              | 1              | 30,805                    | 26                               | 63,469,487                            | 67,973,584                                   |
| MTB/EX/FS        | Exact           | Prob-FS              | 10                | -12.3808       | 32.35027       | 30,805                    | 26                               | 63,466,474                            | 3,013                                        |
| MTB/EX/EM        | Exact           | Prob-EM              | 10                | -12.9681       | 23.51965       | 30,805                    | 371,180                          | 63,466,474                            | 28,065                                       |
| MTB/EX/D         | Exact           | Det                  | 4                 | 0              | 3              | 30,805                    | 402,743                          | 63,469,487                            | 68,003,556                                   |
| CU/EX/FS         | Exact           | Prob-FS              | 10                | -12.3808       | 32.35027       | 30,805                    | 26                               | 63,464,504                            | 3,012                                        |
| LP/EX/FS         | Exact           | Prob-FS              | 10                | -7.53877       | 12.78385       | 30,805                    | 26                               | 63,466,474                            | 3,013                                        |
| LP/EX/EM         | Exact           | Prob-EM              | 10                | -7.53877       | 12.78385       | 30,805                    | 26                               | 63,466,474                            | 3,013                                        |
| MTB/INEX/FS      | Inexact         | Prob-FS              | 916,806           | -12.3808       | 32.35027       | 30,805                    | 3                                | 2,040,621                             | 139                                          |
| MTB/INEX/EM      | Inexact         | Prob-EM              | 916,807           | -12.9681       | 23.51965       | 30,805                    | 3                                | 2,040,621                             | 1                                            |
| MTB/INEX/D       | Inexact         | Det                  | 266,929           | 0              | 3              | 30,805                    | 3                                | 2,040,760                             | 1                                            |
| CU/INEX/FS       | Inexact         | Prob-FS              | 15,663            | -12.3808       | 32.35027       | 30,828                    | 3                                | 62,405,370                            | 2                                            |
| LP/INEX/FS       | Inexact         | Prob-FS              | 45                | 1.9            | 15.8           | 15                        | 3                                | a                                     | a                                            |
| LP/INEX/EM       | Inexact         | Prob-EM              | 45                | 1.9            | 15.8           | 15                        | 3                                | a                                     | a                                            |

YOB, year of birth; R, R package; MTB, Merge ToolBox; CU, Curtin University Probabilistic Linkage Engine; LP, Link Plus; Prob-FS, probabilistic, Fellegi-Sunter; Prob-EM, probabilistic, expectation-maximization; Prob-EPI, probabilistic, EpiLink; Det, deterministic.

<sup>a</sup> We were unable to recover negative weights for Link Plus with inexact string matching.

**Table H. Agreement with gold standard among records with the highest weights, blocking on YOB.**

| Linkage Run Name | String matching | Weight Determination | Number (%) of Pairs with Highest Weight |               |
|------------------|-----------------|----------------------|-----------------------------------------|---------------|
|                  |                 |                      | Agreement with inpatient MRN            |               |
|                  |                 |                      | No                                      | Yes           |
| R/EX/FS          | Exact           | Prob-FS              | 1,035 (3.4)                             | 29,770 (96.6) |
| R/EX/EM          | Exact           | Prob-EM              | 1,035 (3.4)                             | 29,770 (96.6) |
| R/EX/EPI         | Exact           | Prob-EPI             | 1,035 (3.4)                             | 29,770 (96.6) |
| MTB/EX/FS        | Exact           | Prob-FS              | 1,035 (3.4)                             | 29,770 (96.6) |
| MTB/EX/EM        | Exact           | Prob-EM              | 1,035 (3.4)                             | 29,770 (96.6) |
| MTB/EX/D         | Exact           | Det                  | 1,035 (3.4)                             | 29,770 (96.6) |
| CU/EX/FS         | Exact           | Prob-FS              | 1,035 (3.4)                             | 29,770 (96.6) |
| LP/EX/FS         | Exact           | Prob-FS              | 1,035 (3.4)                             | 29,770 (96.6) |
| LP/EX/EM         | Exact           | Prob-EM              | 1,035 (3.4)                             | 29,770 (96.6) |
| MTB/INEX/FS      | Inexact         | Prob-FS              | 1,035 (3.4)                             | 29,770 (96.6) |
| MTB/INEX/EM      | Inexact         | Prob-EM              | 1,035 (3.4)                             | 29,770 (96.6) |
| MTB/INEX/D       | Inexact         | Det                  | 1,035 (3.4)                             | 29,770 (96.6) |
| CU/INEX/FS       | Inexact         | Prob-FS              | 1,047 (3.4)                             | 29,781 (96.6) |
| LP/INEX/FS       | Inexact         | Prob-FS              | 2 (13.3)                                | 13 (86.7)     |
| LP/INEX/EM       | Inexact         | Prob-EM              | 2 (13.3)                                | 13 (86.7)     |

YOB, year of birth; R, R package; MTB, Merge ToolBox; CU, Curtin University Probabilistic Linkage Engine; LP, Link Plus; Prob-FS, probabilistic, Fellegi-Sunter; Prob-EM, probabilistic, expectation-maximization; Prob-EPI, probabilistic, EpiLink; Det, deterministic.

**Table I. Standard decision rule characteristics for the 15 YOB linkage runs when declared matches are those with the highest weight.**

| Linkage Run Name | String matching | Weight Determination | Sensitivity <sup>a</sup> (%) | Specificity <sup>b</sup> (%) | PPV <sup>c</sup> (%) | NPV <sup>d</sup> (%) |
|------------------|-----------------|----------------------|------------------------------|------------------------------|----------------------|----------------------|
| R/EX/FS          | Exact           | Prob-FS              | 90.48                        | 100.00                       | 96.64                | 100.00               |
| R/EX/EM          | Exact           | Prob-EM              | 90.48                        | 100.00                       | 96.64                | 100.00               |
| R/EX/EPI         | Exact           | Prob-EPI             | 90.48                        | 100.00                       | 96.64                | 100.00               |
| MTB/EX/FS        | Exact           | Prob-FS              | 90.48                        | 100.00                       | 96.64                | 100.00               |
| MTB/EX/EM        | Exact           | Prob-EM              | 90.48                        | 100.00                       | 96.64                | 100.00               |
| MTB/EX/D         | Exact           | Det                  | 90.48                        | 100.00                       | 96.64                | 100.00               |
| CU/EX/FS         | Exact           | Prob-FS              | 90.48                        | 100.00                       | 96.64                | 100.00               |
| LP/EX/FS         | Exact           | Prob-FS              | 90.48                        | 100.00                       | 96.64                | 100.00               |
| LP/EX/EM         | Exact           | Prob-EM              | 90.48                        | 100.00                       | 96.64                | 100.00               |
| MTB/INEX/FS      | Inexact         | Prob-FS              | 90.48                        | 100.00                       | 96.64                | 100.00               |
| MTB/INEX/EM      | Inexact         | Prob-EM              | 90.48                        | 100.00                       | 96.64                | 100.00               |
| MTB/INEX/D       | Inexact         | Det                  | 90.48                        | 100.00                       | 96.64                | 100.00               |
| CU/INEX/FS       | Inexact         | Prob-FS              | 90.51                        | 100.00                       | 96.60                | 100.00               |
| LP/INEX/FS       | Inexact         | Prob-FS              | 0.04                         | 100.00                       | 86.67                | 99.98                |
| LP/INEX/EM       | Inexact         | Prob-EM              | 0.04                         | 100.00                       | 86.67                | 99.98                |

YOB, year of birth; PPV, positive predictive value; NNV, negative predictive value; R, R package; MTB, Merge ToolBox; CU, Curtin University Probabilistic Linkage Engine; LP, Link Plus; Prob-FS, probabilistic, Fellegi-Sunter; Prob-EM, probabilistic, expectation-maximization; Prob-EPI, probabilistic, EpiLink; Det, deterministic.

All test characteristics are based on comparison with the gold standard, inpatient MRN.

<sup>a</sup> Sensitivity = percentage of record pairs with matching inpatient MRNs that are declared matches.

<sup>b</sup> Specificity = percentage of record pairs without matching inpatient MRNs that are declared non-matches.

<sup>c</sup> PPV = percentage of pairs that are declared matches for which the inpatient MRNs agree.

<sup>d</sup> NPV = percentage of pairs declared nonmatches for which the inpatient MRNs do not agree.

**Table J. Computation time for date of birth linkage runs.**

| Linkage Run Name | String Matching | Weight Determination | Computational Time (seconds) <sup>a</sup> |
|------------------|-----------------|----------------------|-------------------------------------------|
| R/EX/FS          | Exact           | Prob-FS              | 14                                        |
| R/EX/EM          | Exact           | Prob-EM              | 14                                        |
| R/EX/EPI         | Exact           | Prob-EPI             | 7                                         |
| MTB/EX/FS        | Exact           | Prob-FS              | 16                                        |
| MTB/EX/EM        | Exact           | Prob-EM              | 7                                         |
| MTB/EX/D         | Exact           | Det                  | 8                                         |
| CU/EX/FS         | Exact           | Prob-FS              | ~5                                        |
| LP/EX/FS         | Exact           | Prob-FS              | ~55                                       |
| LP/EX/EM         | Exact           | Prob-EM              | ~55                                       |
| R/INEX/FS        | Inexact         | Prob-FS              | 10                                        |
| R/INEX/EM        | Inexact         | Prob-EM              | 12                                        |
| MTB/INEX/FS      | Inexact         | Prob-FS              | 10                                        |
| MTB/INEX/EM      | Inexact         | Prob-EM              | 9                                         |
| MTB/INEX/D       | Inexact         | Det                  | 11                                        |
| CU/INEX/FS       | Inexact         | Prob-FS              | ~5                                        |
| LP/INEX/FS       | Inexact         | Prob-FS              | ~55                                       |
| LP/INEX/EM       | Inexact         | Prob-EM              | ~55                                       |

R, R package; MTB, Merge ToolBox; CU, Curtin University Probabilistic Linkage Engine; LP, Link Plus; Prob-FS, probabilistic, Fellegi-Sunter; Prob-EM, probabilistic, expectation-maximization; Prob-EPI, probabilistic, EpiLink; Det, deterministic.

<sup>a</sup> ~ indicates timing not provided by linkage program.

**Table K. Computational time for year of birth linkage runs.**

| Linkage Run Name | String Matching | Weight Determination | Computational Time (seconds) <sup>a</sup> |
|------------------|-----------------|----------------------|-------------------------------------------|
| R/EX/FS          | Exact           | Prob-FS              | 3,825                                     |
| R/EX/EM          | Exact           | Prob-EM              | 3,352                                     |
| R/EX/EPI         | Exact           | Prob-EPI             | 3,020                                     |
| MTB/EX/FS        | Exact           | Prob-FS              | 879                                       |
| MTB/EX/EM        | Exact           | Prob-EM              | 1,283                                     |
| MTB/EX/D         | Exact           | Det                  | 1,645                                     |
| CU/EX/FS         | Exact           | Prob-FS              | 375                                       |
| LP/EX/FS         | Exact           | Prob-FS              | 70                                        |
| LP/EX/EM         | Exact           | Prob-EM              | 66                                        |
| MTB/INEX/FS      | Inexact         | Prob-FS              | 915                                       |
| MTB/INEX/EM      | Inexact         | Prob-EM              | 1,101                                     |
| MTB/INEX/D       | Inexact         | Det                  | 1630                                      |
| CU/INEX/FS       | Inexact         | Prob-FS              | 375                                       |
| LP/INEX/FS       | Inexact         | Prob-FS              | 71                                        |
| LP/INEX/EM       | Inexact         | Prob-EM              | 71                                        |

R, R package; MTB, Merge ToolBox; CU, Curtin University Probabilistic Linkage Engine; LP, Link Plus; Prob-FS, probabilistic, Fellegi-Sunter; Prob-EM, probabilistic, expectation-maximization; Prob-EPI, probabilistic, EpiLink; Det, deterministic.



## Supporting information references

1. Borg A, Sariyar M. Package 'RecordLinkage' 2016 [updated July 27; cited 2018 August 16]. Available from: <https://cran.r-project.org/web/packages/RecordLinkage/RecordLinkage.pdf>.
2. Centers for Disease Control and Prevention. [To Parent Directory] Atlanta, GA: Centers for Disease Control and Prevention; 1999 [cited 2018 October 8]. Available from: <ftp://ftp.cdc.gov/pub/Software/>.
